# Supplementary material
Source: publisher figshare collection journal article supplement (https://gsajournals.figshare.com/ndownloader/files/13297304)
Supplement: Supplementary file 1 [file 13297304]

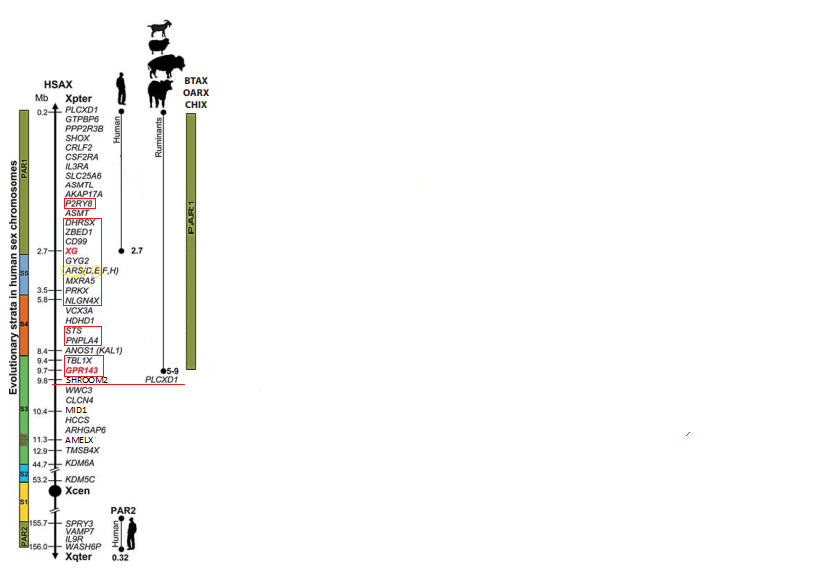


Figure S2. Locations of the 14 ovine expressed, X-linked genes in the ruminant pseudoautosomal region (PAR). The Human X chromosome (*HSAX*) is used to illustrate the organization of the human PARs (PAR1 and PAR2) and the evolutionary strata (S1-S5). Pseudoautosomal boundaries are shown by genes in pink texts. The human PAR1 is 2.7 Mb starting at the gene *PLCXD1* and ending at XG. The human PAR2 is 0.32 Mb. The ruminant PAR ranges from 5-9 Mb and starts at the gene *GTPB6P* and ends at *GPR143*. . In ruminants, the gene *PLCXD1* is X-linked but not located in PAR and its location is marked by a red line below the ruminant PAR. The 14 expressed X-linked genes that are located in the ruminant PAR are enclosed in red boxes. They are *P2RY8, DHRSX, ZBED1, CD99, XG, GYG2, ARSE, MXRA5, PRKX, NLGN4X, STS, PNPLA4, TBL1X, AND GPR143.* Modified from Raudsepp et al. 2015.
